# Supplementary material for: Rapid Limit Test of the Eight Quinolones Residue in the Food Based on TLC-SERS
Source: Preprints.org preprint supplement (doi:10.20944/preprints202308.1194.v1), 2023-08-16
Supplement: Supplementary file 1 [file supplementary]

## Supplementary Materials:

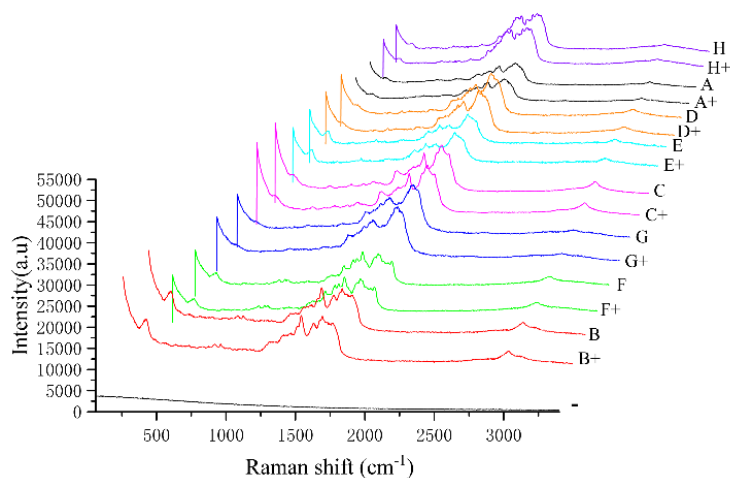

**Figure SM<sub>1</sub>.** SERS of the eight quinolones in the simulated positive sample by the TLC-SERS (H,A,D, E, C, G, F, and B represents Nadifloxacin, Enrofloxacin, Fleroxacin, Sparfloxacin, Ofloxacin, Gatifloxacin, Enoxacin, and Ciprofloxacin, respectively. H<sup>+</sup>, A<sup>+</sup>, E<sup>+</sup>, D<sup>+</sup>, C<sup>+</sup>, G<sup>+</sup>, F<sup>+</sup>, B<sup>+</sup> represents Simulated positive samples containing H, A, D, E, C, G, F, and B; “—” represents Negative sample.)

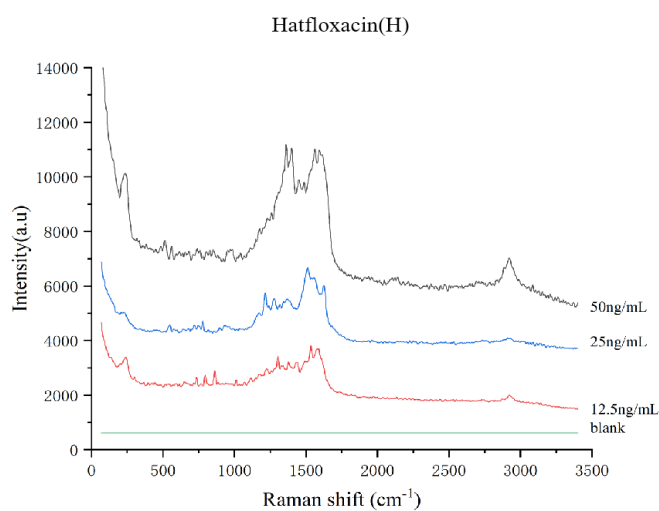

**Figures SM<sub>2</sub>.** SERS of different concentrations of the hatfloxacin (H) by the TLC-SERS

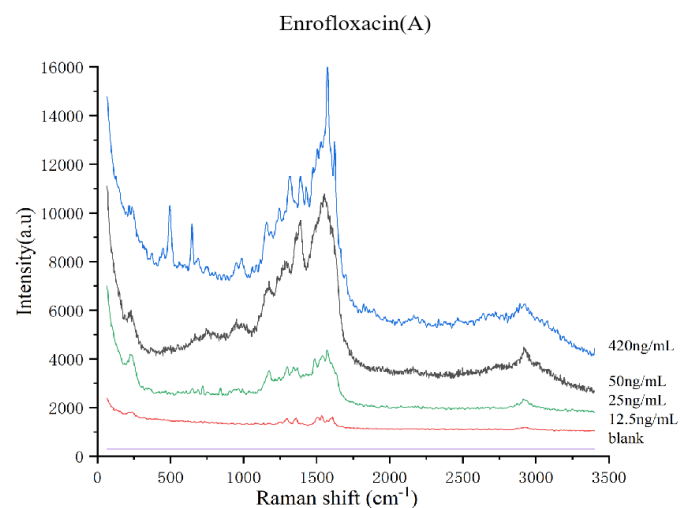

**Figures SM<sub>3</sub>.** SERS of different concentrations of the enrofloxacin (A) by the TLC-SERS

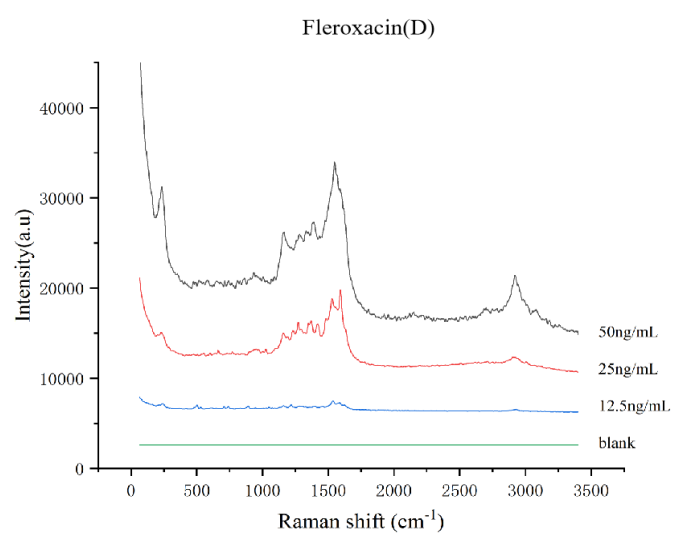

**Figures SM<sub>4</sub>.** SERS of different concentrations of the fleroxacin (D) by the TLC-SERS

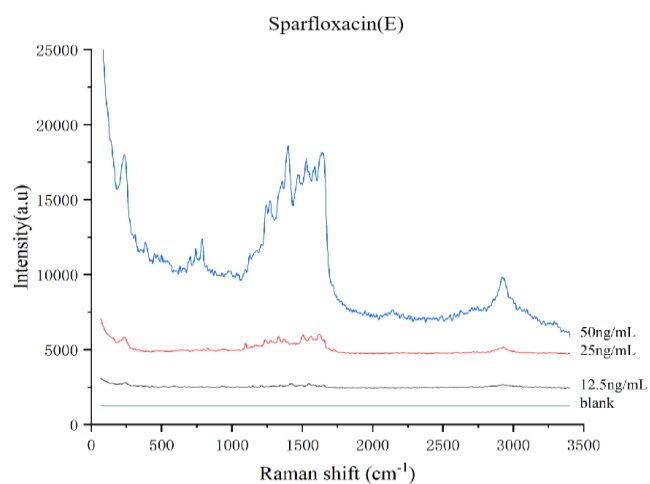

**Figures SM<sub>5</sub>.** SERS of different concentrations of the sparfloxacin (E) by the TLC-SERS

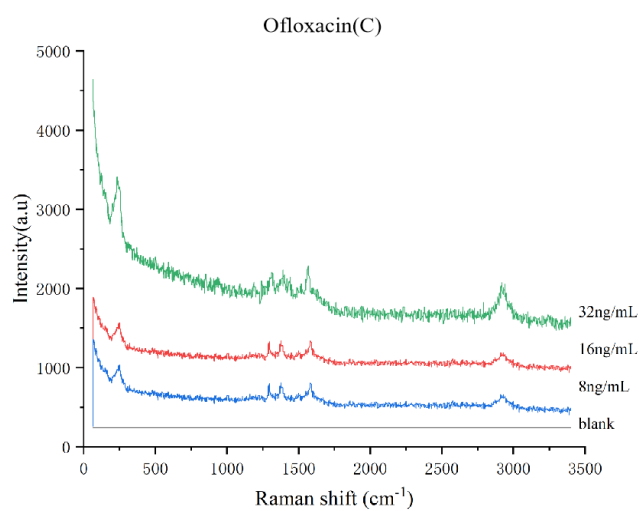

**Figures SM<sub>6</sub>.** SERS of different concentrations of the ofloxacin (C) by the TLC-SERS

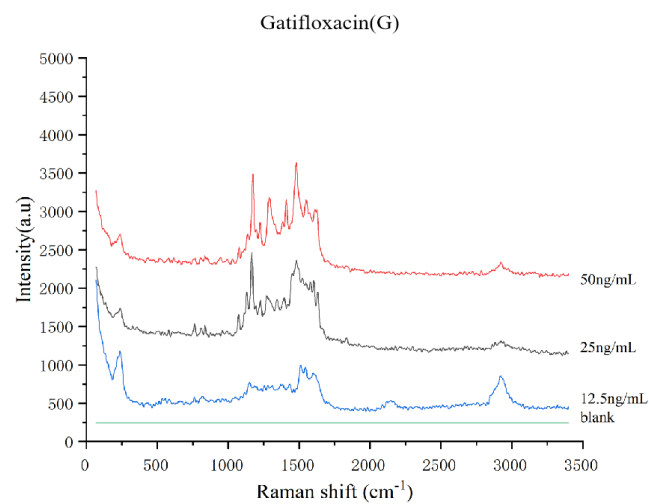

**Figures SM<sub>7</sub>.** SERS of different concentrations of the gatifloxacin (G) by the TLC-SERS

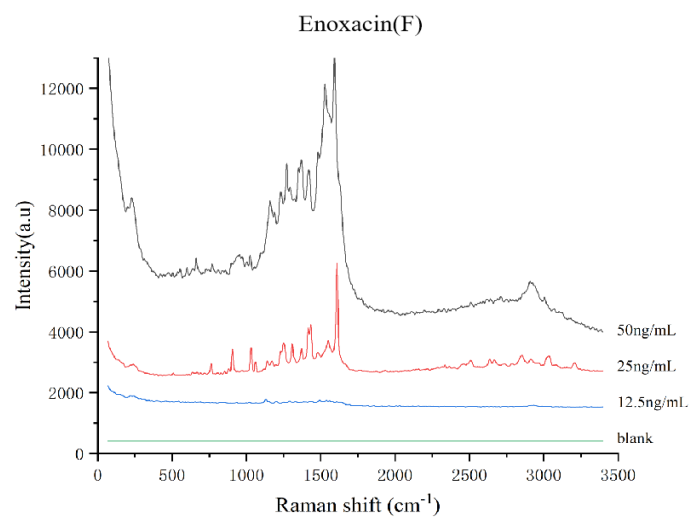

**Figures SM<sub>8</sub>.** SERS of different concentrations of the enoxacin (F) by the TLC-SERS

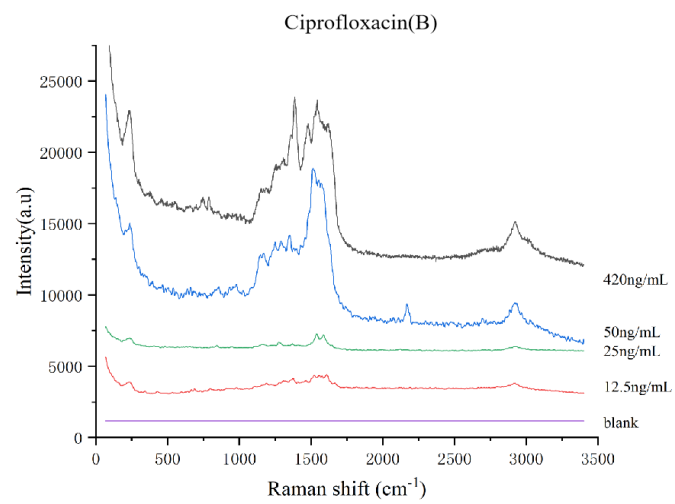

**Figures SM<sub>9</sub>.** SERS of different concentrations of the ciprofloxacin (B) by the TLC-SERS
